# Supplementary material for: Lactoferrin–thymol complex for the disinfection of gram-positive Staphylococcus aureus and Gram-negative Escherichia coli
Source: Royal Society of Chemistry journal article supplement (doi:10.1039/d1fo02153b), 2021-01-01
Supplement: d1fo02153b1.pdf [file d1fo02153b1.pdf]

1

## Supplementary Data

2

### 3 **Lactoferrin-Thymol Complex for Disinfection of Gram-Positive** 4 ***Staphylococcus aureus* and Gram-Negative *Escherichia coli***

5

6 *Mi Yan<sup>#</sup>, Shuyue Dong<sup>#</sup>, Xue Shen, Chengwen Lu, Haiqing Ye, and Tiehua Zhang<sup>\*</sup>*

7

8

9 *College of Food Science and Engineering, Jilin University, Changchun 130062, Jilin,*

10 *China.*

11 *<sup>#</sup> These two authors contributed equally to this work.*

12

13

14 *<sup>\*</sup> Corresponding authors.*

15 *E-mail address: zhangth@jlu.edu.cn*

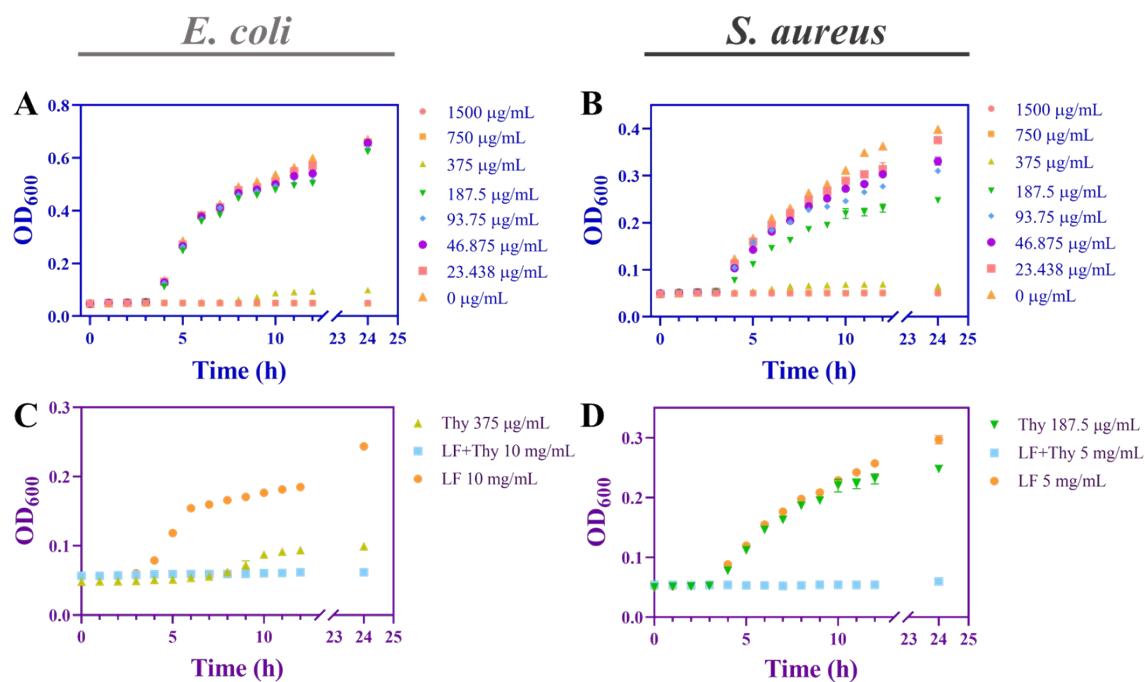

1  
2  
3 **Figure S1.** Growth curves of (A) *E. coli* and (B) *S. aureus* treated with various  
4 concentrations of Thy. [Thy] = 0, 23.438, 46.875, 93.75, 187.5, 375, 750, 1500  
5 µg/mL, the concentration was corresponding to that in LF-Thy complex. (C) Growth  
6 curves of *E. coli* treated with the MIC of LF-Thy (10 mg/mL, the mass ratio of LF  
7 and Thy is 80:3 while the concentration of Thy in LF-Thy is around 375 µg/mL), 10  
8 mg/mL LF alone and 375 µg/mL, respectively. (D) Growth curves of *S. aureus*  
9 treated with the MIC of LF-Thy (5 mg/mL, the mass ratio of LF and Thy is 80:3  
10 while the concentration of Thy in LF-Thy is around 187.5 µg/mL), 5 mg/mL LF  
11 alone and 187.5 µg/mL, respectively. Each value represents the average of three  
12 independent measurements.
